# Supplementary material for: Improving survival of acute-on-chronic liver failure patients complicated with invasive pulmonary aspergillosis
Source: PubMed Central journal article supplement (PMC5772638; doi:10.1038/s41598-018-19320-2), 2018-01-17
Supplement: 41598_2018_19320_MOESM2_ESM.pdf [file 41598_2018_19320_MOESM2_ESM.pdf]

## **Improving survival of acute-on-chronic liver failure patients complicated with invasive pulmonary aspergillosis**

Jie Gao<sup>1\*</sup>, Qing Zhang<sup>2\*</sup>, Yuankui Wu<sup>3\*</sup>, Ying Li<sup>1,4</sup>, Tingting Qi<sup>1</sup>, Congyan Zhu<sup>1</sup>, Sijia Liu<sup>2</sup>, Ruoxi Yu<sup>3</sup>, Qinjun He<sup>1</sup>, Weiqun Wen<sup>1</sup>,  
Fuyuan Zhou<sup>1</sup>, Yongpeng Chen<sup>1</sup>, Jinjun Chen<sup>1</sup>, Jinlin Hou<sup>1</sup>

<sup>1</sup>Hepatology Unit, Department of Infectious Diseases, Nanfang Hospital, Southern Medical University, Guangzhou, China

<sup>2</sup>Pharmacy Department, Nanfang Hospital, Southern Medical University, Guangzhou, China

<sup>3</sup>Department of Medical Imaging, Nanfang Hospital, Southern Medical University, Guangzhou, China

<sup>4</sup>Internal Medicine, Puning People's Hospital, Puning, China

\*These authors contributed equally to this article

### **Corresponding author**

Dr Jinjun Chen

Hepatology Unit, Department of Infectious Diseases, Nanfang Hospital, Southern Medical University, Guangzhou, China

Phone: 86+18588531001 Fax: 862062787423 Email: [chjj@smu.edu.cn](mailto:chjj@smu.edu.cn)

**Supplementary tables**

**Table s1. Demographic, clinical and biochemical characteristics of patients at the time of IPA diagnosis according to CLIF-SOFA lungs core.**

| Characteristic                                | Higher lung score (>1)<br>(n=7) | Lower lung score (<2)<br>(n=13) | p value |
|-----------------------------------------------|---------------------------------|---------------------------------|---------|
| Age (years)                                   | 41 [31, 70]                     | 43 [26, 58]                     | 0.578   |
| Male (n, %)                                   | 6 (85.7)                        | 12 (93.2)                       | 1       |
| Time from enrolment to IPA diagnosis (days)   | 18 [0, 33]                      | 12 [0, 44]                      | 0.780   |
| Time from fever to IPA diagnosis (days)*      | 6.5 [2.0, 14.0]                 | 4.0 [1.0, 14.0]                 | 0.237   |
| Fever (n, %)                                  | 7 (100)                         | 11 (84.6)                       | 0.521   |
| Other infection (n, %)                        | 1 (14.2)                        | 3 (23.1)                        | 1       |
| Voriconazole treatment (n, %)                 | 3 (42.9)                        | 11 (84.6)                       | 0.122   |
| Radiological features                         |                                 |                                 |         |
| Well-shaped nodule(s) with halo sign (n,%)    | 0 (0)                           | 3 (23.1)                        | 0.521   |
| Well-shaped nodule(s) without halo sign (n,%) | 5 (71.4)                        | 10 (76.9)                       | 1       |
| Air-crescent sign (n,%)                       | 0/7                             | 0/13                            | -       |
| Cavitation (n,%)                              | 1 (14.3)                        | 0 (0)                           | 0.350   |
| Masses/consolidation (n,%)                    | 6 (85.7)                        | 3 (23.1)                        | 0.017   |
| Pleural fluid (n,%)                           | 2 (28.6)                        | 5 (38.5)                        | 0.526   |
| Bilateral lung infection (n,%)                | 7 (100)                         | 11 (84.6)                       | 0.521   |
| C-reactive protein (mg/L)                     | 30.0 [16.0, 52.6]               | 35.3 [3.0, 69.4]                | 1.000   |
| Procalcitonin (ng/mL)                         | 1.3 [0.9, 1.9]                  | 1.0 [0.2, 3.1]                  | 0.524   |
| Leukocyte count (10 <sup>9</sup> /L)          | 16.8 [6.1, 23.0]                | 15.0 [3.6, 34.7]                | 0.861   |
| Platelet count (10 <sup>9</sup> /L)           | 57 [27, 100]                    | 54 [24, 199]                    | 0.693   |
| Total bilirubin (mg/dL)                       | 28.8 [9.7, 47.3]                | 24.9 [16.7, 46.1]               | 0.285   |
| Aspartate aminotransferase (U/L)              | 175.9 [35.0, 209.0]             | 87.5 [32.0, 279.3]              | 0.108   |
| Alanine aminotransferase (U/L)                | 75.6 [49.5, 194.0]              | 74.7 [15.0, 197.2]              | 0.735   |
| International normalized ratio                | 2.8 [1.8, 4.6]                  | 2.4 [1.5, 3.5]                  | 0.104   |
| Albumin (mg/L)                                | 25.4 [22.7, 37.4]               | 34.8 [20.9, 40.3]               | 0.446   |
| Creatinine (mg/L)                             | 1 [0.5, 2.8]                    | 0.7 [0.4, 2.2]                  | 0.122   |
| Serum sodium (mmol/L)                         | 128 [123, 139]                  | 135 [130, 140]                  | 0.032   |
| PSI <sup>16</sup>                             | 109 [81, 169]                   | 83 [46, 118]                    | 0.005   |
| CURB-65 <sup>16</sup>                         | 1 [0, 3]                        | 1 [0, 2]                        | 0.097   |
| MELD <sup>15</sup>                            | 33.3 [18.4, 40.9]               | 23.8 [15.4, 37.6]               | 0.052   |
| MELD-Na <sup>15</sup>                         | 37.7 [25.1, 60.0]               | 27.6 [15.4, 45.6]               | 0.008   |
| CLIF-C ACLFs <sup>15</sup>                    | 44.18 [29.4, 57.1]              | 50.53 [47.0, 72.6]              | 0.008   |
| CLIF-SOFA <sup>1</sup>                        | 12 [10, 15]                     | 8 [6, 11]                       | 0.002   |
| Cerebral failure (n, %)                       | 3 (42.9)                        | 0 (0)                           | 0.031   |
| Liver failure (n, %)                          | 6 (85.7)                        | 13 (100)                        | 0.350   |
| Lung failure (n, %)                           | 3 (42.9)                        | 0 (0)                           | 0.031   |
| Coagulation failure (n, %)                    | 5 (71.4)                        | 6 (46.2)                        | 0.374   |
| Kidney failure (n, %)                         | 1 (14.3)                        | 1 (7.7)                         | 1       |
| Circulation failure (n, %)                    | 0 (0)                           | 0 (0)                           | -       |

Data are expressed as the median [min-max] for continuous variables and counts (percentage) for categorical variables.

MELD: Model for end-stage liver disease.

CLIF-SOFA: Chronic Liver Failure-Sequential Organ Failure Assessment.

\*Patients with fever before diagnosis are compared.

**Table s2. ICD-10 codes for related diseases for patient screening.**

| Disease                                | ICD-10 code    |
|----------------------------------------|----------------|
| <b>Related to liver failure</b>        |                |
| Acute alcoholic hepatic failure        | K70.401        |
| Acute drug induced hepatic failure     | K71.102        |
| Acute hepatic failure                  | K72.000        |
| Acute liver function failure           | K72.003        |
| Sub-acute drug-induced hepatic failure | K71.104        |
| Sub-acute hepatic failure              | K72.001        |
| Chronic hepatic failure                | K72.100        |
| Chronic alcoholic hepatic failure      | K70.402        |
| Hepatic failure, nospecified           | K72.900        |
| <b>Related to lung infections</b>      |                |
| Lung infection                         | J98.414        |
| Pneumonia                              | J18.900        |
| Pulmonary fungal infection             | B49. x14       |
| Pulmonary aspergillosis                | B44.100+J99.8* |

Note: Patients diagnosed with “Acute-on-chronic liver failure” without ICD-10 code records were also screened, since acute-on-chronic liver failure has no related ICD-10 code yet.

**Table s3.** The adapted diagnostic criteria for IA based on EORTC/MSG and AspICU criteria.

---

**Probable IA (all three criteria must be met)**

- Host risk factor: ACLF is considered a risk factor
- Clinical features: radiological features (dense, well-circumscribed lesion (s) with or without a halo sign, air crescent sign or cavity, mass(es))
- Mycological criteria: direct test (cytology, direct microscopy, or culture) indicating the presence of *Aspergillus* species or galactomannan antigen detected in plasma

---

**Possible IA**

- Presence of host factor and radiological features (dense, well-circumscribed lesion (s) with or without a halo sign, air crescent sign and cavity, masses), but in the absence of mycological criteria
-
